# Supplementary material for: Inactivating Mutations of the IK Gene Weaken Ku80/Ku70-Mediated DNA Repair and Sensitize Endometrial Cancer to Chemotherapy
Source: MDPI journal article supplement (doi:10.3390/cancers13102487), 2021-05-20
Supplement: s1 [file s1]

**Table S1.** Clinical parameters of 547 EEC patients in TCGA dataset.

| Clinical Parameters | Name                                      | Statistics  |
|---------------------|-------------------------------------------|-------------|
| Primary Site        | Corpus uteri                              | 547 (100%)  |
| Gender              | Female                                    | 547 (100%)  |
| Vital Status        | Alive                                     | 456 (83.3%) |
|                     | Dead                                      | 91 (16.7%)  |
| Race                | White                                     | 374 (68.2%) |
|                     | Black or African American                 | 100 (18.2%) |
|                     | Asian                                     | 20 (3.6%)   |
|                     | Not reported                              | 31 (5.8%)   |
| Ethnicity           | Other                                     | 13 (2.3%)   |
|                     | Not hispanic or latino                    | 376 (68.8%) |
|                     | Hispanic or latino                        | 15 (2.7%)   |
|                     | Not reported                              | 156 (28.5%) |
| Stage               | Stage I, IA, IB, IC                       | 341 (62.4%) |
|                     | Stage II, IIA, IIB                        | 52 (9.5%)   |
|                     | Stage III, IIIA, IIIB, IIIC, IIIC1, IIIC2 | 122 (22.3%) |
|                     | Stage IV, IVA, IVB                        | 32 (5.8%)   |

**Table S3.** Distribution of EEC patients with *IK* mutations.

| Group                    | G1 | G2  | G3  | High-grade |
|--------------------------|----|-----|-----|------------|
| All patients             | 99 | 121 | 313 | 11         |
| With <i>IK</i> mutations | 3  | 4   | 30  | 0          |
| synonymous SNV           | 0  | 0   | 5   |            |
| stopgain                 | 0  | 0   | 3   |            |
| nonsynonymous SNV        | 0  | 2   | 18  |            |
| frameshift substitution  | 0  | 2   | 3   |            |

\*  $p$  -value < 2.2e-16, Fisher's exact test.

**Table S4.** Vital status of *IK* mutated EEC patients and wild-type cases.

| Group          | Death      | Alive       |
|----------------|------------|-------------|
| All patients   | 44 (0.080) | 503 (0.919) |
| With mutations | 0          | 32          |
| No mutations   | 44         | 471         |

\*  $p$  -value < 0.05.

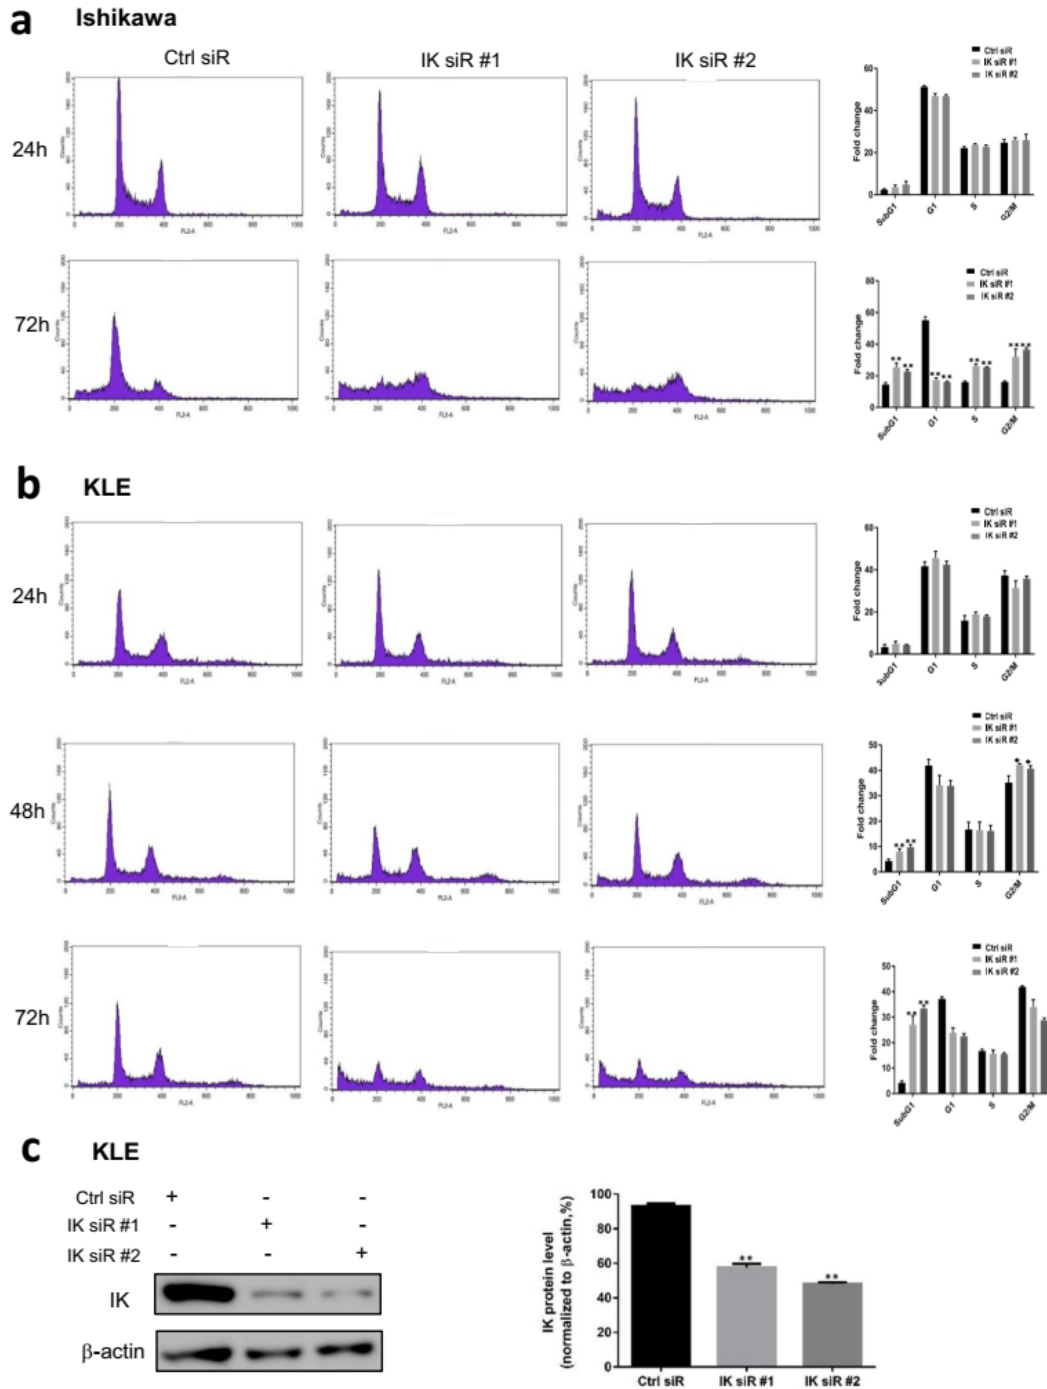

**Figure S1.** IK attenuation affects cell cycle in Ishikawa and KLE cells. **(a).** (Left) Twenty-four and seventy-two hours after IK siRNA transfection in Ishikawa cells, IK attenuation led to enrichment of G2/M cells. (Right) Quantification of Ishikawa cells in different phases. **(b).** (Left) Twenty-four, forty-eight and seventy-two hours after IK siRNA transfection in KLE cells, IK attenuation affected cell cycle. (Right) Quantification of KLE cells in different phases. **c.** (Left) Seventy-two hours after IK siRNA transfection in KLE cells, IK expression was attenuated. (Right) Quantitative analysis of IK protein expression. Mean  $\pm$  SD of at least three independent experiments. (two-sided Student's *t* test, \*  $p < 0.05$ , \*\*  $p < 0.01$ , \*\*\*  $p < 0.001$ ).

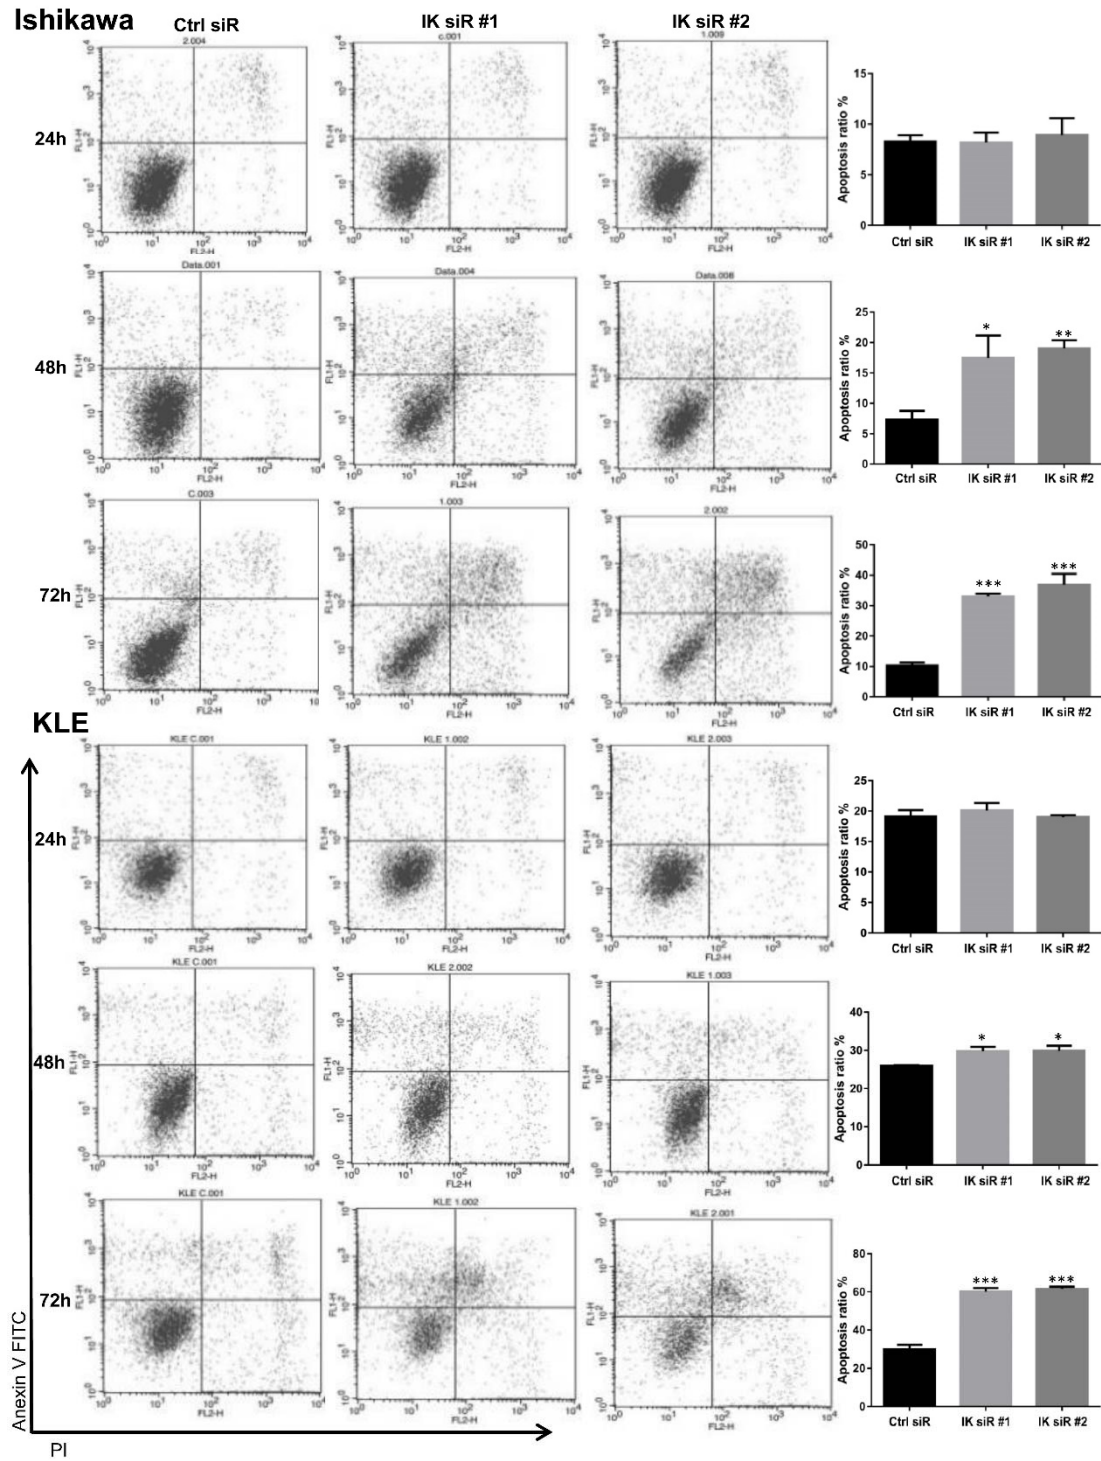

**Figure S2.** IK attenuation causes cell apoptosis in Ishikawa and KLE cells. Different times after IK siRNA transfection, all the cells, including attached and floating cells, were harvested and stained with annexin V-FITC and PI. Then they were analyzed by flow cytometry for cell apoptosis. Mean  $\pm$  SD of at least three independent experiments. (two-sided Student's *t* test, \*  $p < 0.05$ , \*\*  $p < 0.01$ , \*\*\*  $p < 0.001$ ).

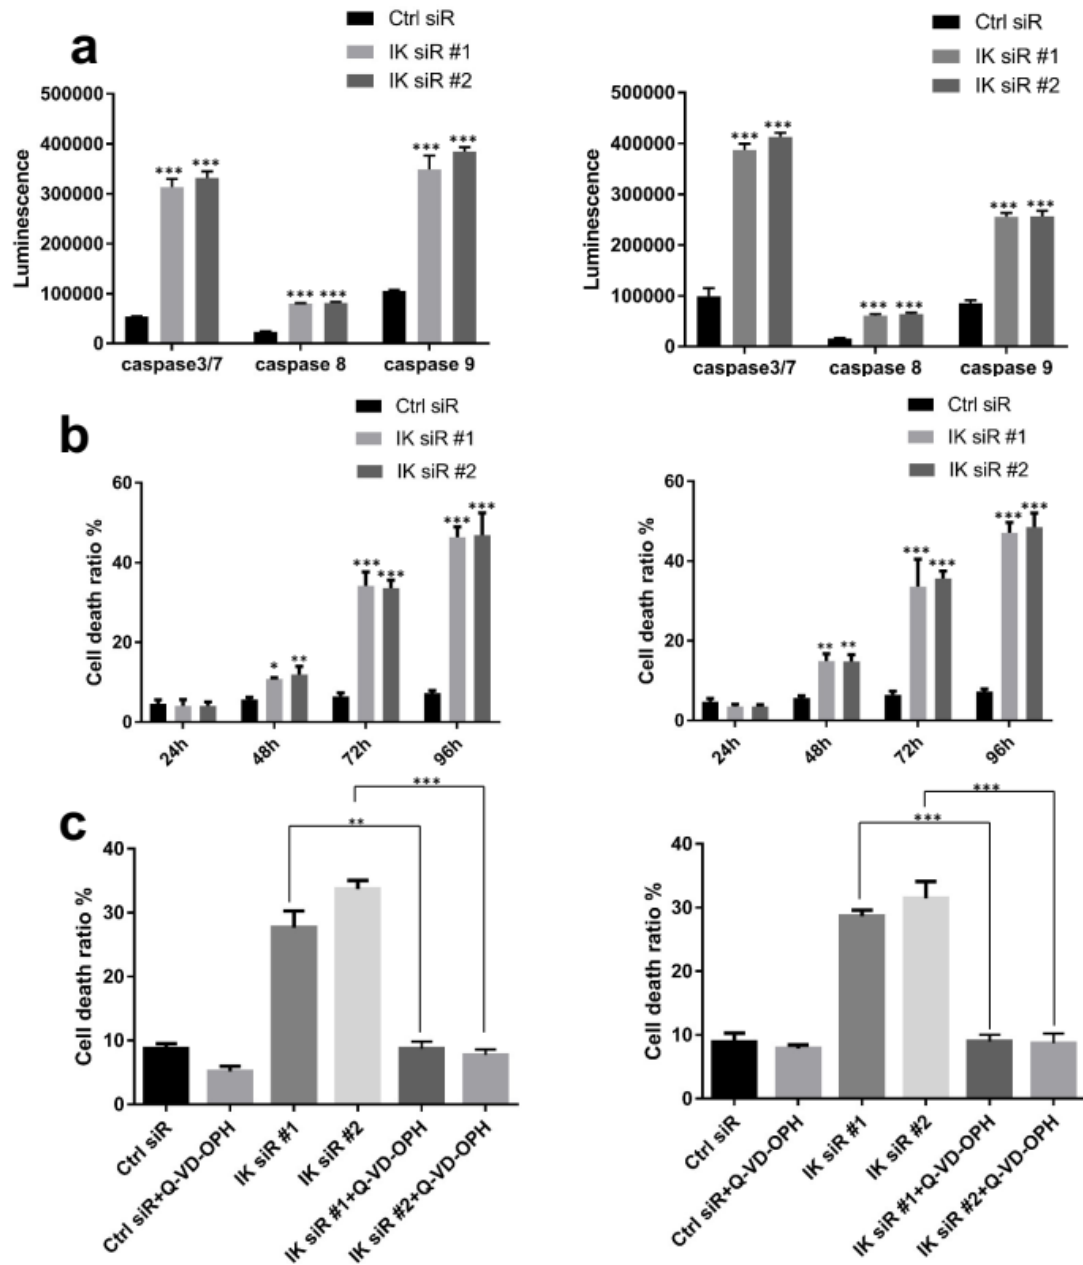

**Figure S3.** IK attenuation causes apoptotic cell death through intrinsic mitochondria dependent and extrinsic death receptor dependent pathways in Ishikawa and KLE cells. (a). Seventy-two hours after IK siRNA transfection in Ishikawa (left) and KLE (right) cells, caspase activity assay showed that caspase3/7, caspase 8 and caspase 9 were activated. (b). Trypan blue exclusion assay showed that IK attenuation caused cell death. c. Seventy-two hours after IK siRNA transfection with or without Q-VD-OPH (cell apoptosis inhibitor) treatment, trypan blue exclusion assay showed that Q-VD-OPH decreased cell death ratio caused by IK attenuation. Mean  $\pm$  SD of at least three independent experiments. (two-sided Student's *t* test, \*  $p < 0.05$ , \*\*  $p < 0.01$ , \*\*\*  $p < 0.001$ ).

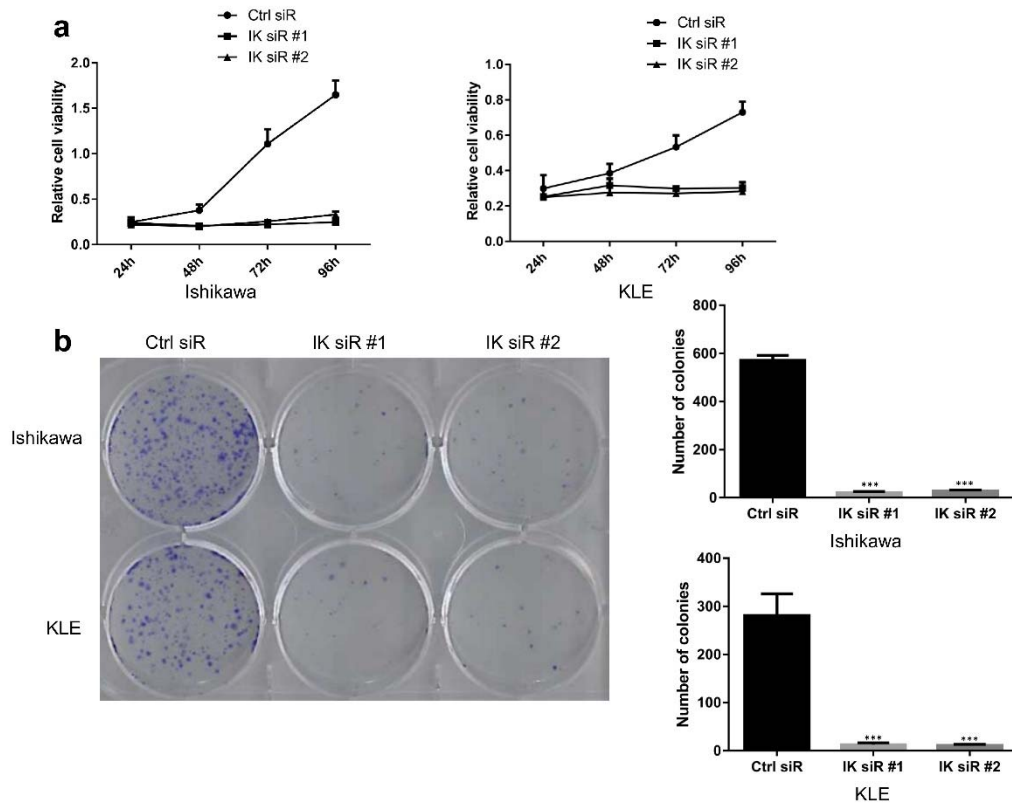

**Figure S4.** IK attenuation inhibits cell viability and cell proliferation in Ishikawa and KLE cells. **(a).** After IK siRNA transfection in Ishikawa and KLE cells, cell viability was inhibited significantly. **(b).** (Left) Transfected cells were seeded in a 6 well plate (700 cells/well) and incubated for 2 weeks. Then cells were stained by 0.1% crystal violet. (Right) Quantification of colonies in Ishikawa and KLE cells. Mean  $\pm$  SD of at least three independent experiments. (two-sided Student's *t* test, \*\*\* *p* < 0.001).

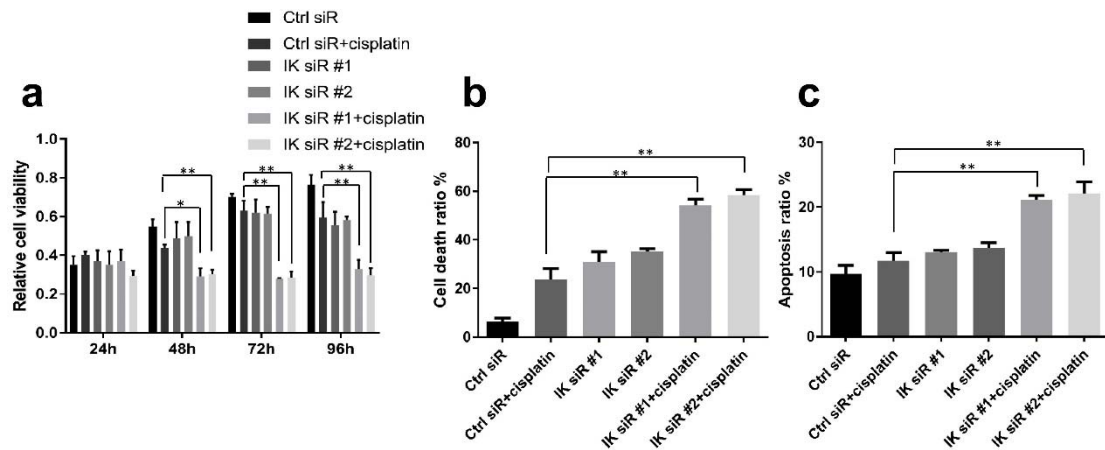

**Figure S5.** IK attenuation sensitizes EC to cisplatin in KLE cells. **(a).** CCK-8 assay showed IK attenuation sensitized KLE cells to cisplatin treatment. The IK siRNA transfection plus cisplatin group inhibited cell viability more significantly. **(b).** Seventy-two hours after IK siRNA transfection with or without cisplatin treatment, the IK siRNA transfection plus cisplatin group had more dead cells on trypan blue exclusion assays. **(c).** Seventy-two hours after IK siRNA transfection with or without cisplatin treatment, the IK siRNA transfection plus cisplatin group had more apoptotic cells. Mean  $\pm$  SD of at least three independent experiments. (two-sided Student's *t* test, \* *p* < 0.05, \*\* *p* < 0.01).

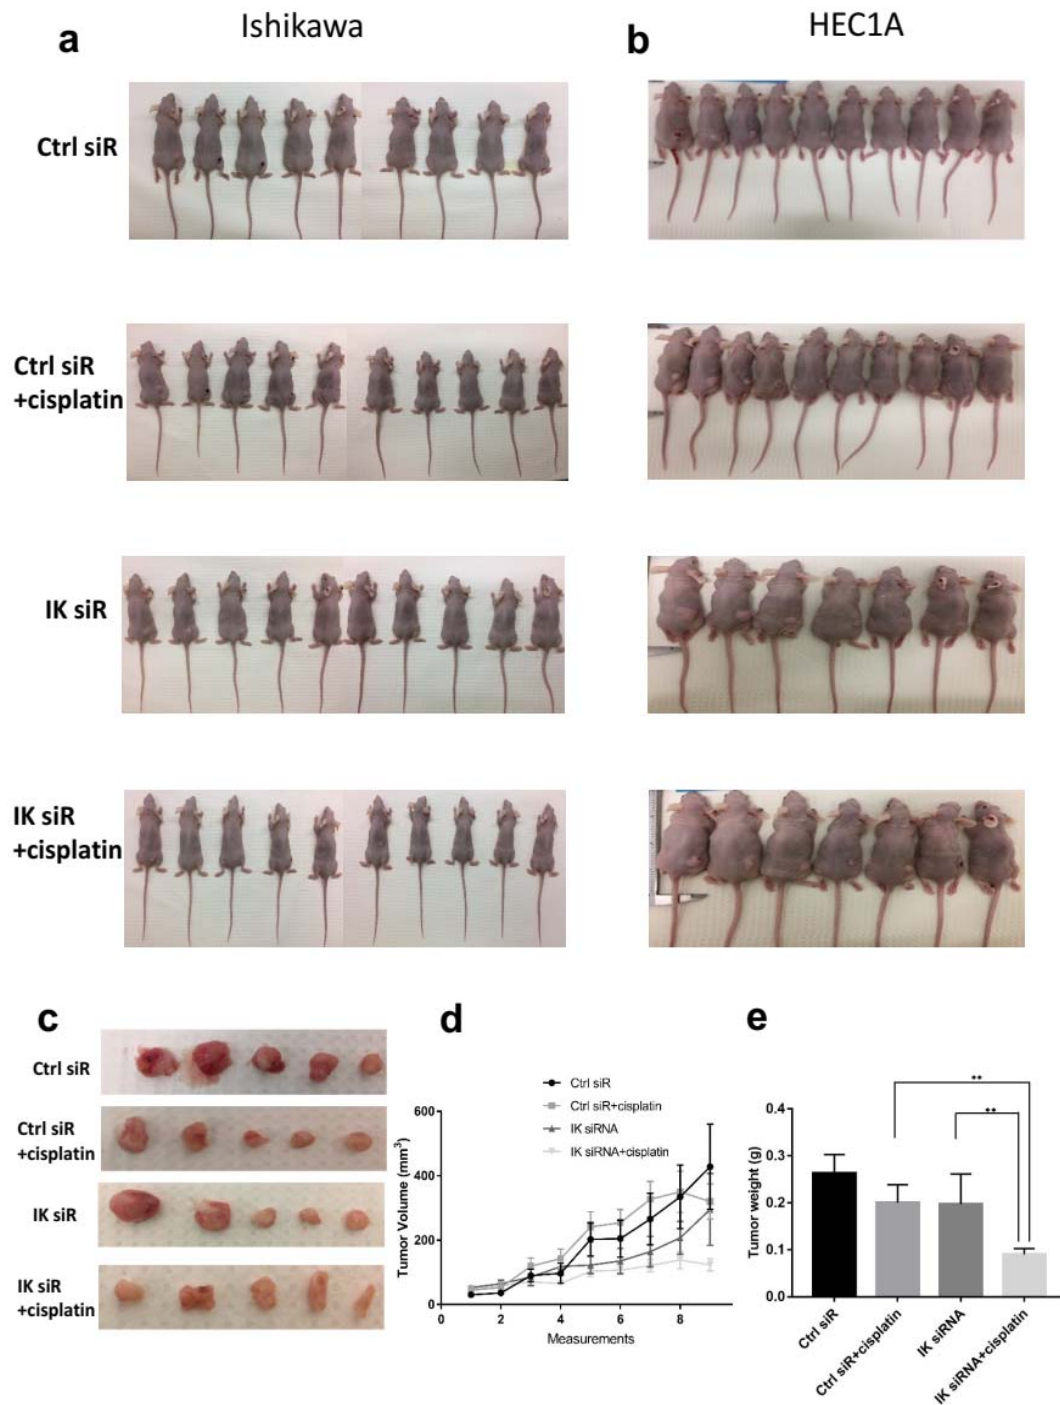

**Figure S6.** IK attenuation inhibits EC cell growth and sensitizes EC to cisplatin *in vivo*. (a). Images of Ishikawa xenograft model. (b). Images of HEC1A xenograft model. c. Representative images of HEC1A xenograft tumors in nude mice treated with control siRNA-DOPC, control siRNA-DOPC plus cisplatin, IK siRNA-DOPC, or IK siRNA-DOPC plus cisplatin (n=10 per group). Tumor volume (d) and tumor weight (e) of HEC1A xenograft tumors in each group 4 weeks after different treatments. (two-sided Student's *t* test, \* *p* < 0.05, \*\* *p* < 0.01, \*\*\* *p* < 0.001).



[illegible]

**Figure S7.** Mass spectrometry result showed that IK interacted with Ku80.

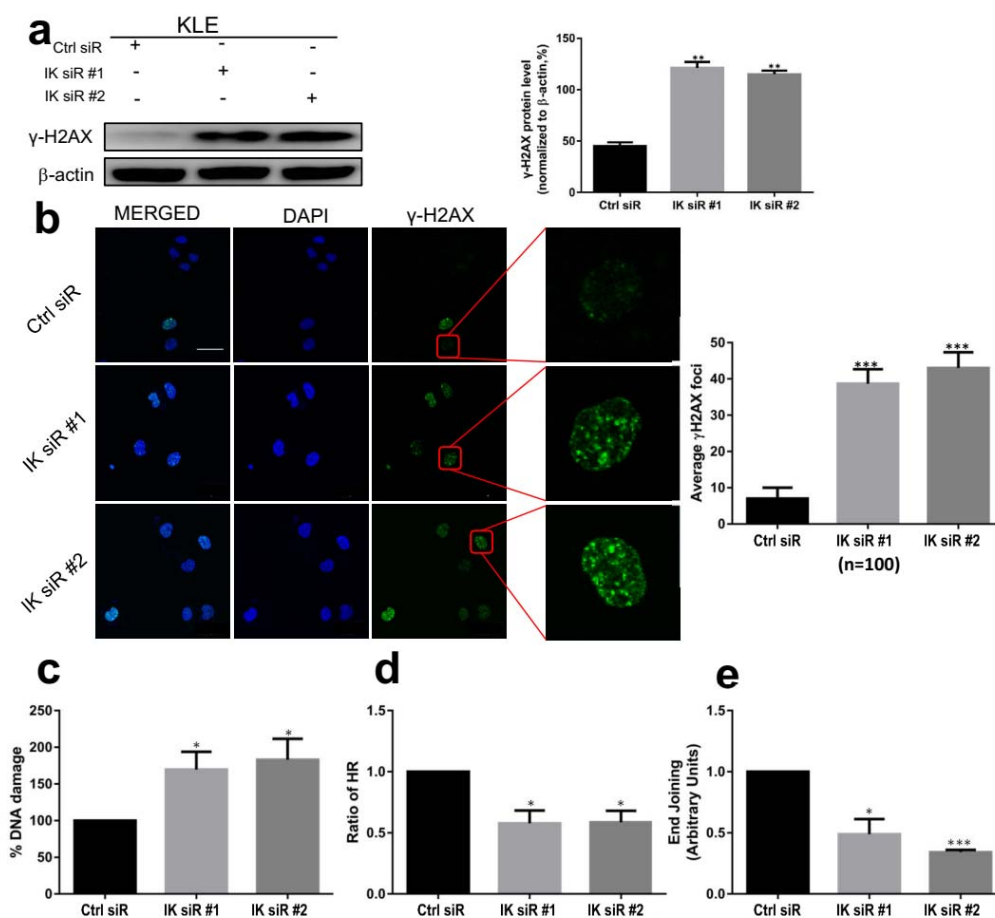

qPCR; IK attenuation weakened NHEJ efficiency. Mean  $\pm$  SD of at least three independent experiments. (two-sided Student's t test, \*  $p < 0.05$ , \*\*  $p < 0.01$ , \*\*\*  $p < 0.001$ ).

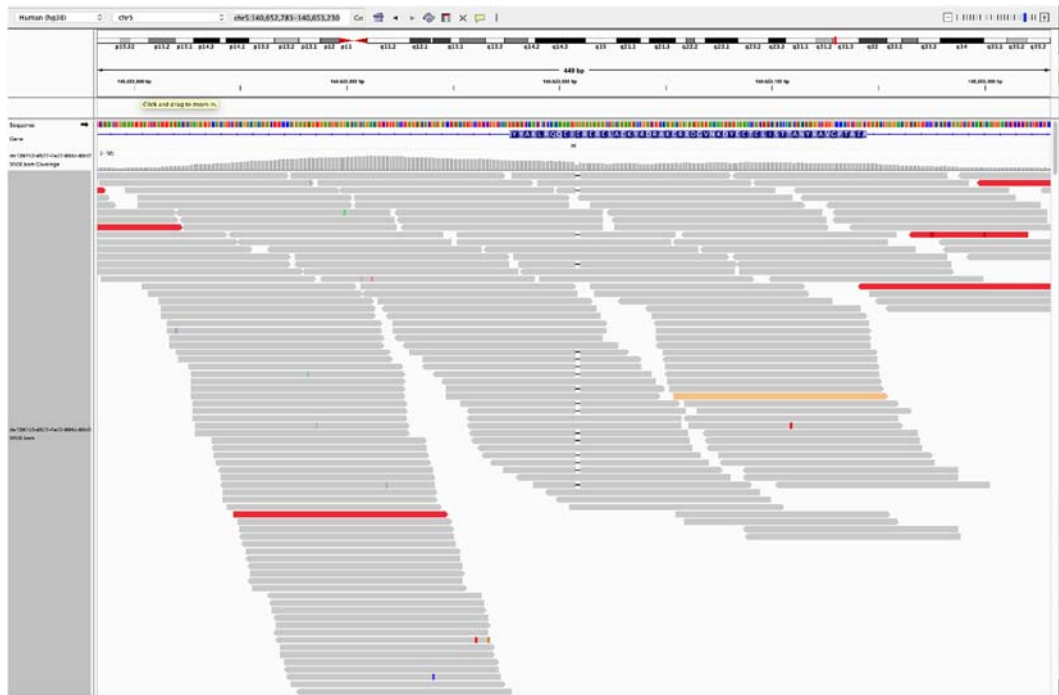

**Figure S9.** Example of manual inspection to confirm the existence of significant numbers of reads in the tumor BAM files, supportive of the initially identified indel.

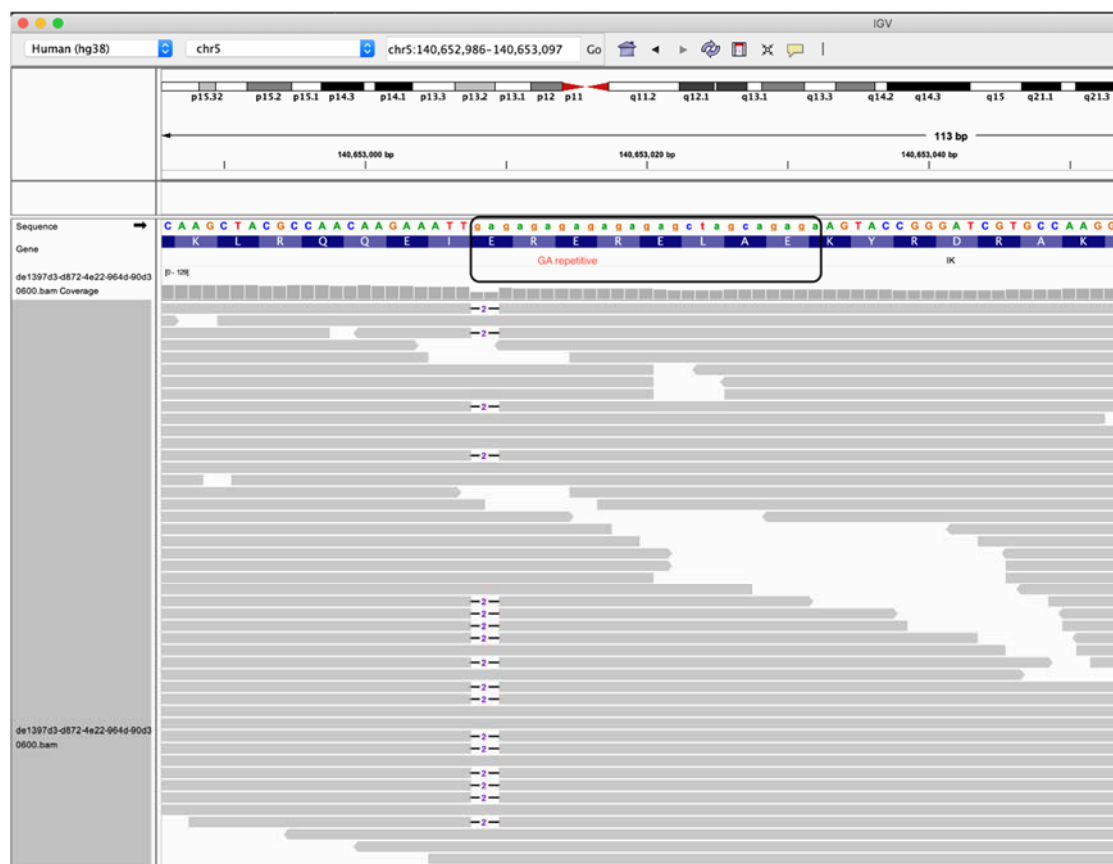

**Figure S10.** IGV software showed that the length of reads in the alignments is much longer than that of the GA repetition.
